# Supplementary material
Source: publisher figshare collection journal article supplement (https://acs.figshare.com/ndownloader/files/5057926)

**Supporting Information  
For**

**Palladium Pincer Complexes with Reduced Bond Angle Strain: Efficient  
Catalysts for the Heck Reaction**

*Myeong Sik Yoon, Dowook Ryu, Jeongryul Kim, and Kyo Han Ahn\**

*Department of Chemistry, POSTECH, San 31 Hyoja-dong, Pohang 790-784, Republic of  
Korea*

*\*To whom correspondence should be made: Tel: +82 54 279-2105, Fax: +82 54 279-3399,  
Email: [ahn@postech.ac.kr](mailto:ahn@postech.ac.kr)*

**Contents**

- (1) Experimental of compounds **3a** and **3b**.
- (2)  $^1\text{H}$  and  $^{13}\text{C}$  NMR spectra of **3a** and **3b**
- (3) A cif file for the X-ray crystal structure of **3b** (as separate file)

### [1,3-bis(2-pyridyloxy)phenyl]palladium chloride (**3a**)

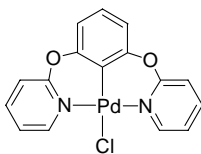

A mixture of 1,3-bis(2-pyridyloxy)benzene (0.26 g, 1.00 mmol),  $\text{K}_2\text{PdCl}_4$  (0.33 g, 1.00 mmol), and glacial acetic acid (6 ml) was refluxed for four days. A yellow suspension was changed to a bright grey solid during the reaction. The mixture was allowed to cool to room temperature. The bright grey solid was filtered through a Büchner funnel and washed sequentially with  $\text{H}_2\text{O}$ , MeOH, and  $\text{Et}_2\text{O}$  to give pure **3a**. Yield: 0.23 g (80%). Mp: 270-272 °C.  $^1\text{H}$  NMR ( $\text{CDCl}_3$ , 300 MHz):  $\delta$  6.98 (d,  $J = 7.8$  Hz, 2H, Py-H), 7.1 (m, 3H, Py-H), 7.29 (d,  $J = 8.2$  Hz, 2H, Ar-H), 7.86 (t,  $J = 6.3$  Hz, 2H, Py-H), 9.30 (m, 2H, Py-H).  $^{13}\text{C}$  NMR ( $\text{CDCl}_3$ , 75 MHz):  $\delta$  158.0, 152.3, 151.0, 141.0, 126.1, 118.6, 114.5, 113.3, 110.9. HRMS (FAB) calcd for  $\text{C}_{16}\text{H}_{11}\text{N}_2\text{O}_2\text{Pd} (\text{M}-\text{Cl})^+$  368.9855, found 368.9860.

1,3-Bis(2-pyridyloxy)benzene was prepared from the reaction of 2-bromopyridine with resorcinol, according to the literature (ref. 7).

### [1,3-bis(2-pyridyloxy)phenyl]palladium(II) trifluoromethanesulfonate (**3b**)

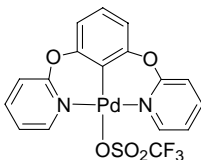

A mixture of **3a** (0.18 g, 0.44 mmol), silver triflate (0.11 g, 0.44 mmol), and dichloromethane (5 ml) was stirred for 7 h. The mixture was filtered through Celite to remove silver chloride and washed with dichloromethane. The solvent was evaporated to give **3b** as a pale yellow solid. Yield: 0.22 g (92%). Mp: 250-252 °C.  $^1\text{H}$  NMR ( $\text{CDCl}_3$ , 300 MHz):  $\delta$  6.99 (d,  $J = 7.9$  Hz, 2H, Py-H), 7.23 (m, 3H, Ar-H, Py-H), 7.34 (d,  $J = 8.3$  Hz, 2H, Ar-H), 7.93 (t,  $J = 7.3$  Hz, 2H, Py-H), 8.75 (m, 2H, Py-H).  $^{13}\text{C}$  NMR ( $\text{CDCl}_3$ , 75 MHz):  $\delta$  157.2, 150.6, 149.8, 141.5, 126.7, 121.4, 117.2 ( $-\text{OSO}_2\text{CF}_3$ ), 119.2, 114.5, 113.6, 103.7.  $^{19}\text{F}$  NMR ( $\text{CDCl}_3$ , 300 MHz):  $\delta$  -1.6. HRMS (FAB) calcd for  $\text{C}_{16}\text{H}_{11}\text{N}_2\text{O}_2\text{Pd} (\text{M}-\text{OTf})^+$  368.9855, found 368.9848.

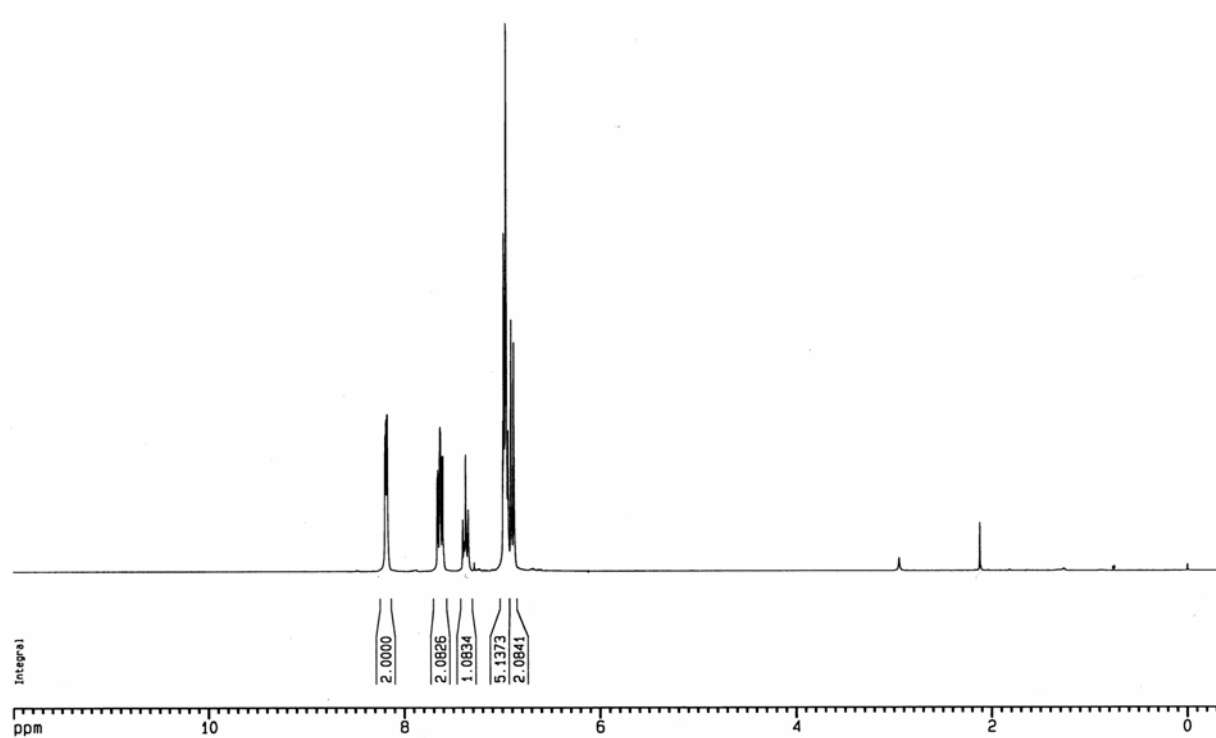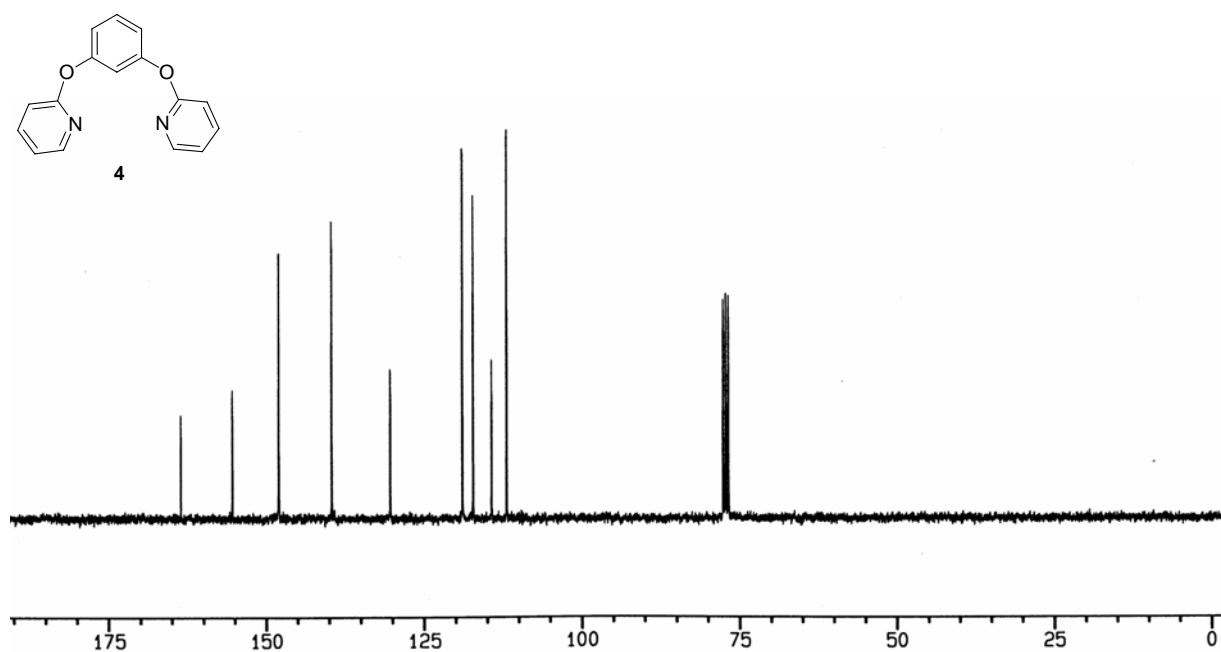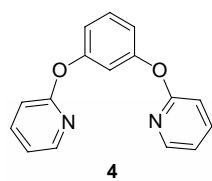

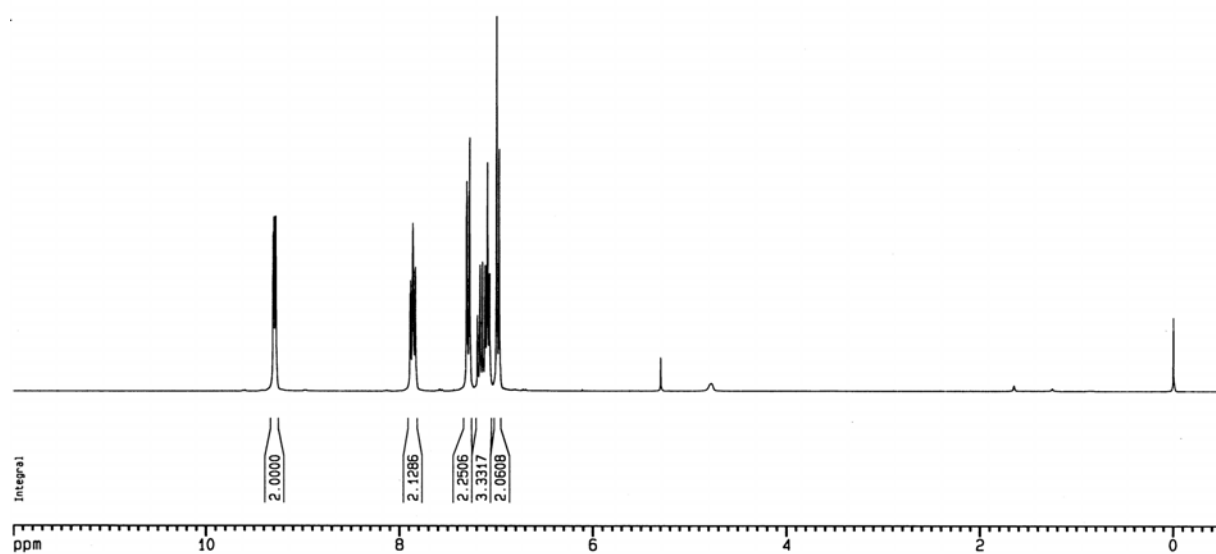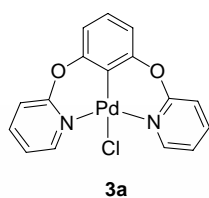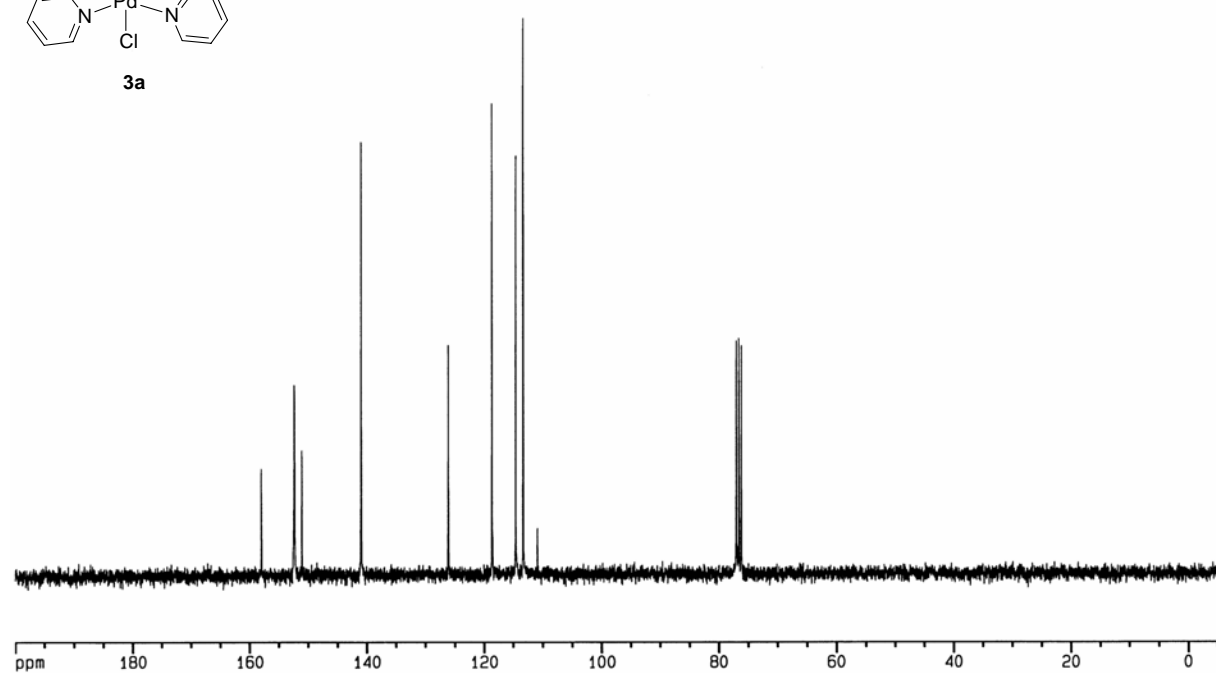

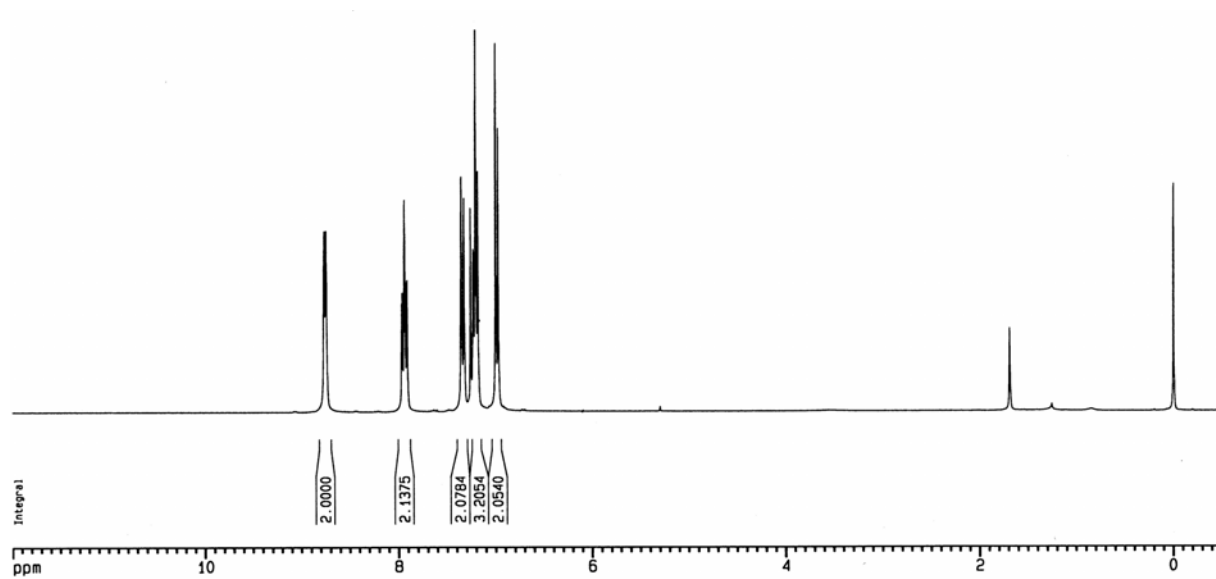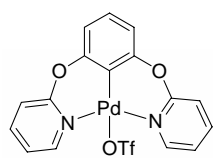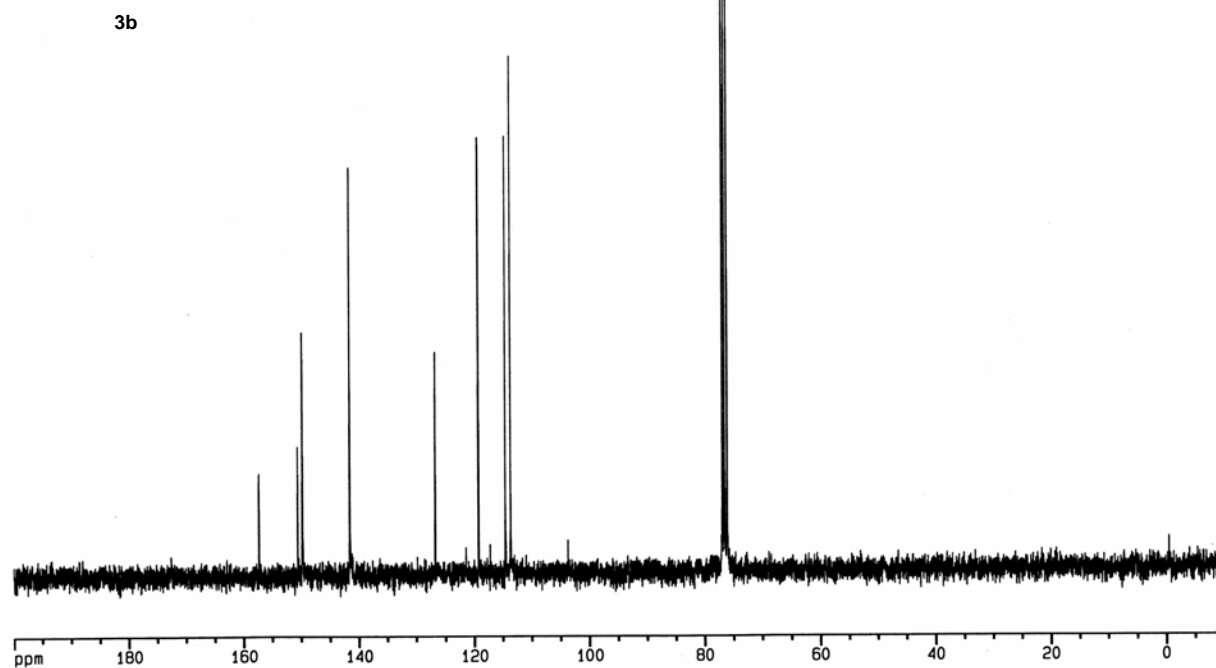

Supplement: Supplementary file 1 [file 5057926]
